# Supplementary material for: The Stem Cell Phenotype of Aggressive Breast Cancer Cells
Source: MDPI journal article supplement (doi:10.3390/cancers11030340), 2019-03-08
Supplement: s1 [file s1]

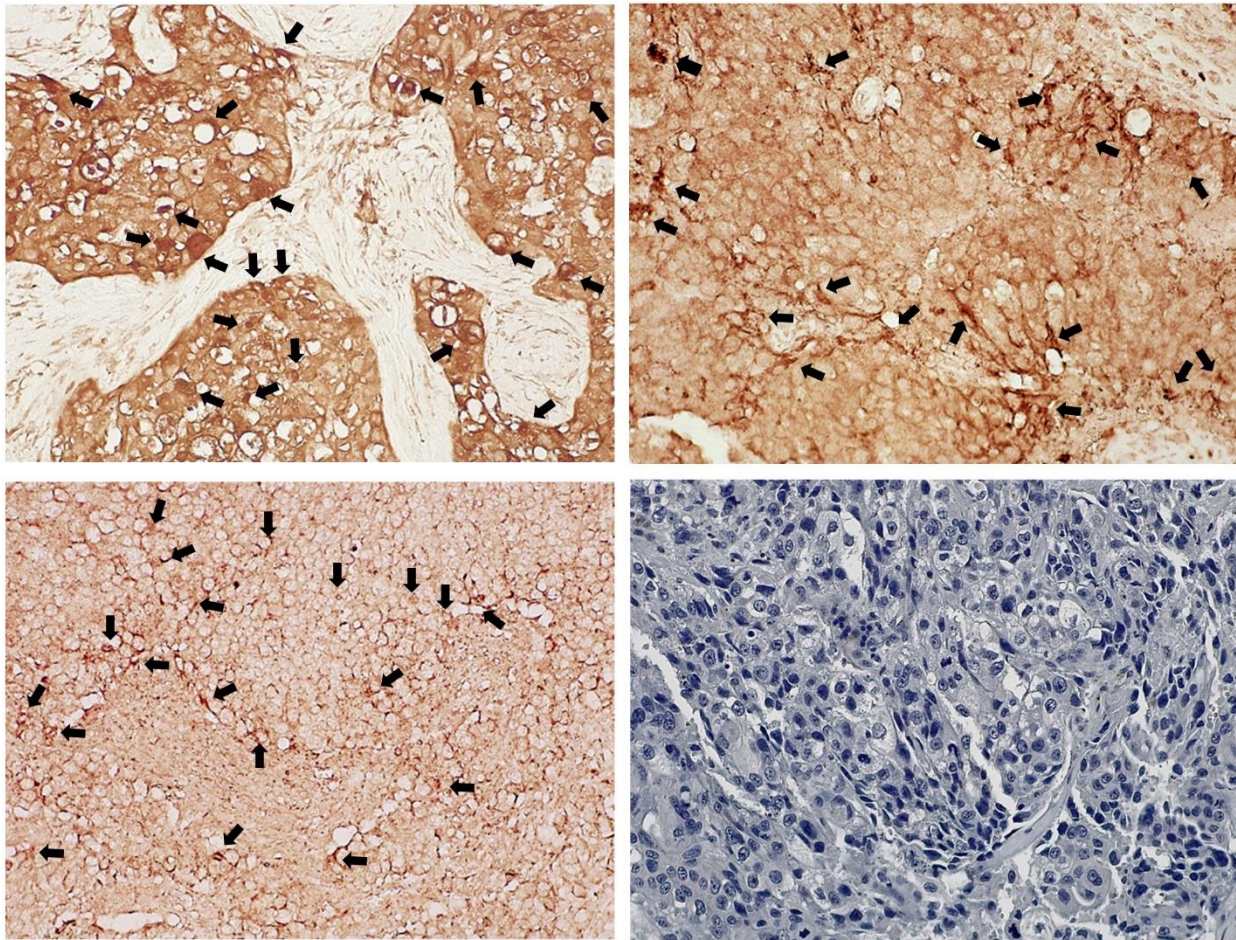

**Supplemental Figure S1.** Breast cancer patient tumor sections, pre- and post-current standard-of-care-treatments (ACT, TCHP and TC), were examined by dual-immunohistochemical staining against a background of Nodal (brown) and ABCA1 (red), black arrows point to dual stained (brown-red) cells demonstrating a colocalization of Nodal and ABCA1. IgG was used as a control for non-specific staining (X20 original magnification).
